# Supplementary material for: Levee system transformation in coevolution between human and water systems along the Kiso River, Japan
Source: Copernicus journal article supplement (doi:10.5194/egusphere-2023-2866), 2023-12-18
Supplement: Supplementary file 1 [file egusphere-2023-2866-supplement.pdf]

## Supplementary

### Levee system transformation in coevolution between human and water systems along the Kiso River, Japan

5

Shinichiro Nakamura<sup>1</sup>, Fuko Nakai<sup>2</sup>, Yuichiro Ito<sup>1</sup>, Ginga Okada<sup>1</sup>, and Taikan Oki<sup>3</sup>

<sup>1</sup> Department of Civil and Environmental Engineering, Nagoya University, Nagoya, 464-8603, Japan

10 <sup>2</sup> Department of Civil and Environmental Engineering, Nagoya Institute of Technology, Nagoya, 466-8555, Japan

<sup>2</sup> Department of Civil Engineering, The University of Tokyo, Tokyo, 113-8656, Japan

*Correspondence to:* Shinichiro Nakamura (shinichiro@civil.nagoya-u.ac.jp)

15

**Table S1** List of historic maps which used in this study. The year in the column indicates the survey year for each map.

| Maps of Survey Bureau, Army Department, General Staff Headquarters, Imperial Japanese Army (SAGIJ maps) [Scale: 1:20,000] |                |       |
|---------------------------------------------------------------------------------------------------------------------------|----------------|-------|
| Era                                                                                                                       |                | 1890s |
| Name of map (area)                                                                                                        | Shimoike       | 1891  |
|                                                                                                                           | Takada-cho     | 1891  |
|                                                                                                                           | Tarui          | 1891  |
|                                                                                                                           | Ikeno-mura     | 1891  |
|                                                                                                                           | Kuwana         | 1891  |
|                                                                                                                           | Fukaya-mura    | 1891  |
|                                                                                                                           | Ohta-mura      | 1891  |
|                                                                                                                           | Takasu         | 1891  |
|                                                                                                                           | Funatsuki-mura | 1891  |
|                                                                                                                           | Ogaki          | 1891  |
|                                                                                                                           | Kitagata-cho   | 1891  |
|                                                                                                                           | Kiso-kako      | 1891  |
|                                                                                                                           | Kanie-cho      | 1891  |
|                                                                                                                           | Tsushima-cho   | 1891  |
|                                                                                                                           | Inazawa-cho    | 1891  |
|                                                                                                                           | Takehana-cho   | 1891  |
|                                                                                                                           | Kasamatsu-cho  | 1891  |
|                                                                                                                           | Gifu           | 1891  |
|                                                                                                                           | Kagamihara     | 1891  |
|                                                                                                                           | Inuyama        | 1891  |

**Maps of Geospatial Information Authority of Japan (GIAJ maps) [Scale: 1:25,000]**

| Era                |             | 1920s | 1930s | 1940s | 1960s | 1980s | 1990s | 2000s |
|--------------------|-------------|-------|-------|-------|-------|-------|-------|-------|
| Name of map (area) | Komano      | 1920  | 1932  | 1959  | 1968  | 1984  | 1992  | 2007  |
|                    | Yoro        | 1920  | 1932  | 1959  | 1968  | 1984  | 1992  | 2007  |
|                    | Ogaki       | 1920  | 1932  | 1947  | 1970  | 1988  | 1994  | 2007  |
|                    | Ikeno       | 1920  | 1932  | 1947  | 1970  | 1984  | 1994  | 2007  |
|                    | Kuwana      | 1920  | 1932  | 1947  | 1968  | 1984  | 1993  | 2007  |
|                    | Yatomi      | 1920  | 1932  | 1947  | 1968  | 1984  | 1993  | 2000  |
|                    | Tsushima    | 1920  | 1932  | 1959  | 1968  | 1984  | 1992  | 2007  |
|                    | Takehana    | 1920  | 1932  | 1959  | 1968  | 1984  | 1992  | 2007  |
|                    | Gifu-seibu  | 1920  | 1932  | 1947  | 1970  | 1988  | 1994  | 2007  |
|                    | Kitagata    | 1920  | 1932  | 1947  | 1970  | 1988  | 1994  | 2007  |
|                    | Ichinomiya  | 1920  | 1932  | 1947  | 1968  | 1986  | 1992  | 2007  |
|                    | Kagamihara  | 1920  | 1932  | 1947  | 1970  | 1987  | 1992  | 2007  |
|                    | Gifu-hokubu | 1920  | 1932  | 1947  | 1970  | 1987  | 1992  | 2007  |
|                    | Inuyama     | 1920  | 1932  | 1947  | 1970  | 1987  | 1992  | 1997  |

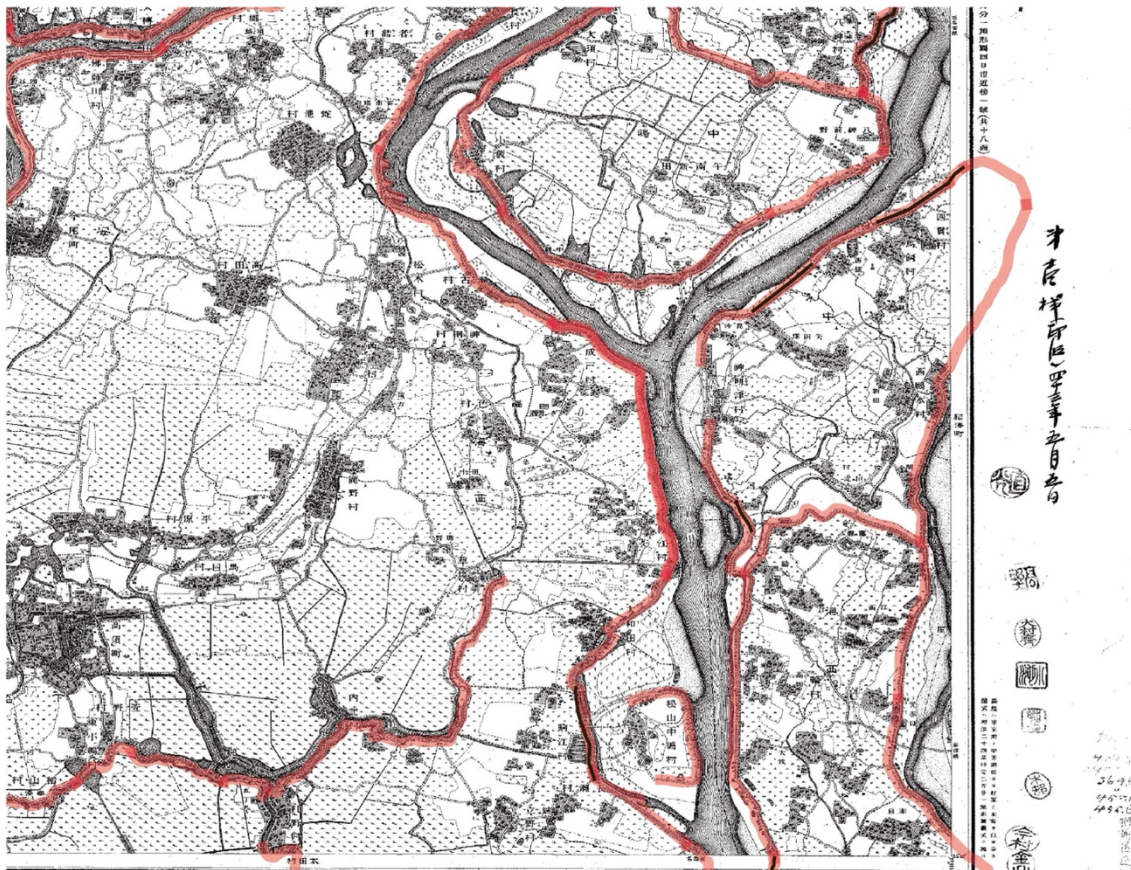

**Figure S2** Example of a historical map. Levee marks were visually identified and converted to shape data. This map is based on the Map of Survey Bureau, Army Department, General Staff Headquarters, Imperial Japanese Army [Scale: 1:20,000] published by Geospatial Information Authority of Japan.
